# Supplementary material for: Tuning molecular fluctuation to boost the conductance in DNA based molecular wires
Source: Royal Society of Chemistry journal article supplement (doi:10.1039/c9cp03589c), 2019-01-01
Supplement: c9cp03589c2.pdf [file c9cp03589c2.pdf]

## Tuning molecular fluctuation to boost the conductance in DNA based molecular wire : Supporting Information

Saientan Bag<sup>1</sup> and Prabal K Maiti<sup>1\*</sup>

<sup>1</sup>Center for Condensed Matter Theory, Department of Physics, Indian Institute of Science, Bangalore  
560012

### Section I: Effect of Na<sup>+</sup> ions on the frontier molecular orbitals (FMO)

To check the effect of the Na<sup>+</sup> ions on the frontier molecular orbitals (FMO), we now calculated the FMOs of a Guanine dimer (see Figure S1 below), chosen from the G4-Quad structure. We performed calculation with Na<sup>+</sup> ions and without Na<sup>+</sup> ions taken into account and found that the FMOs remains unaltered.

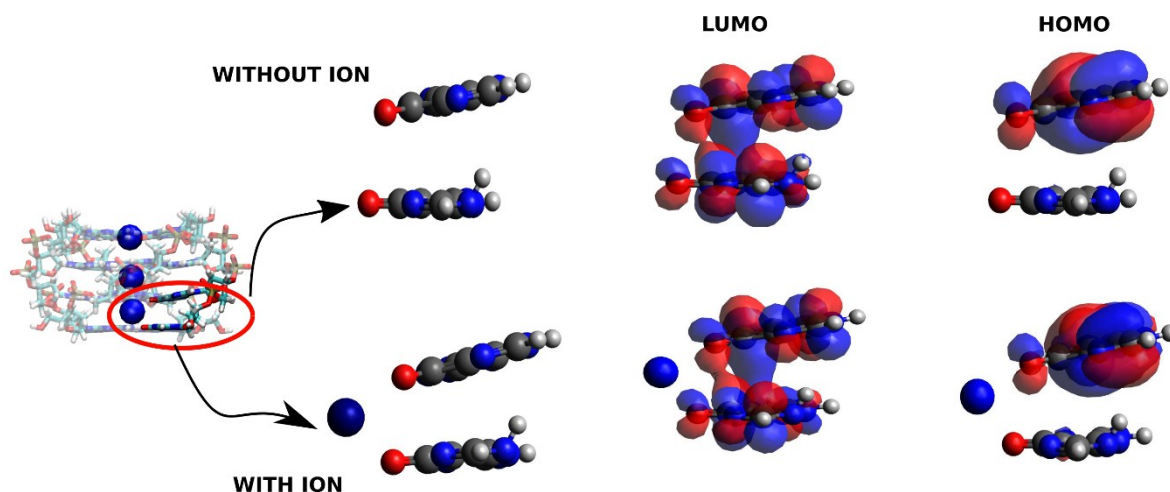

Fig: S1: LUMO and HOMO of a Guanine dimer in a G4-Quad Structure. LUMO and HOMO remain unaltered with the inclusion of Na<sup>+</sup> ions in the DFT calculation.
